# Supplementary material
Source: PubMed Central journal article supplement (PMC2995718)
Supplement: supp_17.3.265_JAMIA_appendixA_004333.pdf [file supp_17.3.265_JAMIA_appendixA_004333.pdf]

Hide completed

Sort by author

Find Incomplete

Hide excluded

## Article Information

Title

Author

Journal

Year

Check References  YesAdded from References  YesExclude  YesDomain  Healthcare

Other

Type of Article

Descriptive

Intervention

Literature Review

Viewpoint

Theory

Other

Researcher Perspective

Human Factors

Sociotechnical

CSCW

Other Engineering

Unclear/Unknown

Other

## Study Details

Level of Focus

Technology

Individuals

Organizations

Teams

Unclear/Unknown

Other

Study Subjects

Patients

Physicians

Nurses

Office Workers

Unclear/Unknown

Other

Length of Study

Years

Months

Weeks

Hours

Unclear/Unknown

Other

## Scope of Study

## Definition of Workflow

## Methods Information

### Types of Methods

- Qualitative  
 Quantitative  
 Mixed  
 Unclear/Unknown

**Other**

### Specific Methods Used

- Ethnographic Observation  
 Interviews  
 Surveys  
 Artifact Collection  
 Structured Observation  
 Focus Group  
 Usage Analysis  
 Software Extraction  
 Unclear/Unknown

**Other**

## Steps to Ensure Reliability and Validity

- Unclear/Unknown

**Other**

## Findings Generalizable to Other Environments

- Yes  
 No  
 Unknown/Unclear

## Methods Generalizable to Other Environments

- Yes  
 No  
 Unknown/Unclear

**Dependent Variables (IOM Categories)**

- Yes **Safe:** avoiding injuries to patients from the care that is intended to help them  
Details
- Yes **Effective:** providing services based on scientific knowledge to all who would benefit  
Details
- Yes **Patient-centered:** providing care that is respectful of and responsive to patients' needs  
Details
- Yes **Timely:** reducing waits and delays for those who receive and give care  
Details
- Yes **Efficient:** avoiding waste of equipment, supplies, ideas, and energy  
Details
- Yes **Equitable:** providing consistent care  
Details

**Major Findings****1****2****3**Finished  Yes**Abstract**
