# Supplementary material
Source: PubMed Central journal article supplement (PMC2995718)
Supplement: supp_17.3.265_JAMIA_appendixB_004333.pdf [file supp_17.3.265_JAMIA_appendixB_004333.pdf]

| <b>First Author</b> | <b>Year</b> | <b>Definition of workflow</b>                                                                                                                                                                                              | <b>Scope of study</b>                                                                                        | <b>Keyword 1</b> | <b>Keyword 2</b>               | <b>Keyword 3</b>       |
|---------------------|-------------|----------------------------------------------------------------------------------------------------------------------------------------------------------------------------------------------------------------------------|--------------------------------------------------------------------------------------------------------------|------------------|--------------------------------|------------------------|
| Abeta               | 1999        | Personal workflow: knowledge of work process                                                                                                                                                                               | Prototype trial of personal information manager (PIM) used to extract workflow data from individual users    | personal         | knowledge                      | process                |
| Agbulos             | 2003        | Work processes, involving groups of tasks.                                                                                                                                                                                 | Description of maintenance work, development of simulation.                                                  | processes        | groups of tasks                | simulation             |
| Alexopoulos         | 2001        | Activities in a clinic and the relationships among those activities                                                                                                                                                        | Development of workflow simulation tools for set of community health clinics                                 | activities       | relationships among activities | simulation             |
| Alter               | 2003        | Work System - a system in which human participants and/or machines perform business processes using information, technologies, and other resources to produce products and/or services for internal or external customers. | Defining a framework through which IS researchers can understand business processes, not just IT artifacts.  | products         | technology                     | work system            |
| Andersson           | 2003        | Work activities and procedures                                                                                                                                                                                             | Case study at a pediatric clinic                                                                             | activities       | procedures                     |                        |
| Andriole            | 2002        | Actions taken to capture and deliver radiology images                                                                                                                                                                      | Quantitative measurement of workflow variables in use of three different radiology technologies at two sites | actions          | technology                     | quantitative variables |
| Balka               | 2006        | Work activities, although really no definition provided                                                                                                                                                                    | Configuring to make a wireless paging system in one Canadian hospital                                        | activities       | configuring                    | technology             |

| <b>First Author</b> | <b>Year</b> | <b>Definition of workflow</b>                                                                                       | <b>Scope of study</b>                                                                                                                                   | <b>Keyword 1</b> | <b>Keyword 2</b> | <b>Keyword 3</b> |
|---------------------|-------------|---------------------------------------------------------------------------------------------------------------------|---------------------------------------------------------------------------------------------------------------------------------------------------------|------------------|------------------|------------------|
| Balka               | 2007        | Work processes developed before technology implementation; work practices developed after technology implementation | Focused on medication administration technology in one hospital                                                                                         | processes        | technology       | implementation   |
| Bardram             | 1997        | Activity system/ Activity theory. Focused on coordination of activities.                                            | Ethnographic study of the coordination of work among health care workers. Five hospitals were studied.                                                  | activity system  | coordination     | activities       |
| Bardram             | 1997        | Work activities, especially collaboration and coordination                                                          | Designed system to assist with planning of care                                                                                                         | activities       | coordination     | planning         |
| Barley              | 2001        | Detailed field studies of organizations and work structures                                                         | Argument for more empirical studies of work.                                                                                                            | organizations    | structures       |                  |
| Baxter              | 2005        | Standard procedures and daily routines                                                                              | Work processes on a NICU ward, with the goal of understanding context prior to implementing decision support                                            | standard         | procedures       | routines         |
| Berg                | 1999        | Focused on reading and writing activities.                                                                          | Describes findings that support the concept of IT as embedded in work practices, specifically focusing on reading and writing activities of clinicians. | information      | tasks            |                  |

| First Author | Year | Definition of workflow                                                                                           | Scope of study                                                                                                                                                                                                                   | Keyword 1   | Keyword 2 | Keyword 3     |
|--------------|------|------------------------------------------------------------------------------------------------------------------|----------------------------------------------------------------------------------------------------------------------------------------------------------------------------------------------------------------------------------|-------------|-----------|---------------|
| Berg         | 1999 | Work practices are conceptualized as networks of people, tools, organizational routines, documents and so forth. | A sociotechnical approach to PCISs in health care is outlined, and two implications of this empirically grounded approach for the practices of developing and evaluating IT applications in health care practices are discussed. | practices   | networks  | technology    |
| Berg         | 2003 | Work processes and tasks                                                                                         | This paper queries whether a detailed modeling of work processes and data flows is the primary step that needs to be completed before such EPRs can be developed or tailored.                                                    | process     | modeling  | data flow     |
| Bertelsen    | 2005 | Work sequence                                                                                                    | Work sequence during rounds at the unit level (2 units)                                                                                                                                                                          | sequence    | temporal  |               |
| Blomberg     | 1996 | Focus on document work.                                                                                          | Deepen understanding of document work practices and explore opportunities for collaborative work-oriented design.                                                                                                                | document    | practices | collaborative |
| Bodker       | 2006 | Focuses on flexible work environment - researchers that need to collaborate.                                     | A participatory design study that developed prototypes of technologies to produce social awareness among workers in a flexible work environment.                                                                                 | environment | flexible  | collaborate   |

| <b>First Author</b> | <b>Year</b> | <b>Definition of workflow</b>                                                                 | <b>Scope of study</b>                                                                                                                                                        | <b>Keyword 1</b>    | <b>Keyword 2</b>         | <b>Keyword 3</b>  |
|---------------------|-------------|-----------------------------------------------------------------------------------------------|------------------------------------------------------------------------------------------------------------------------------------------------------------------------------|---------------------|--------------------------|-------------------|
| Borycki             | 2006        | Tasks                                                                                         | Simulation exercise                                                                                                                                                          | tasks               | completion               |                   |
| Bowers              | 1995        | How work unfolds over time, separated into workflow from within and from without              | Shopfloors at three sites                                                                                                                                                    | time                | from within              | from without      |
| Brixey              | 2007        | Work activities                                                                               | Focused on interruptions and their impact on workflow and other processes in the trauma section of one ED                                                                    | activities          | technology               | role              |
| Burke               | 2000        | Time spent in specific categories of activities.                                              | Compare results obtained from a time-and-motion study with those obtained using self-reporting.                                                                              | time                | categories of activities | time-motion study |
| Campbell            | 2007        | Macro-level view - goal is to understand optimal allocation of treatment resources in the UK. | Development of a simulation of podiatric services, modeling demography of patient population, staffing, clinical conditions, and predicting treatment demand and unmet need. | resource allocation | macro-level              |                   |
| Capuano             | 2004        | Activities                                                                                    | Workflow on one med/surg unit at one hospital, repeated pre/post process improvement intervention                                                                            | activities          | process                  |                   |

| <b>First Author</b> | <b>Year</b> | <b>Definition of workflow</b>                                                                                                                                     | <b>Scope of study</b>                                                                                                                                                                         | <b>Keyword 1</b> | <b>Keyword 2</b> | <b>Keyword 3</b> |
|---------------------|-------------|-------------------------------------------------------------------------------------------------------------------------------------------------------------------|-----------------------------------------------------------------------------------------------------------------------------------------------------------------------------------------------|------------------|------------------|------------------|
| Carayon             | 2004        | A process is represented from an organizational POV as a series of tasks with a number of transitions/handoffs necessitating communication between various people | Human factors analysis using work system model                                                                                                                                                | process          | communication    | transitions      |
| Carayon             | 2006        | Work system: includes person, organization, technologies/tools, tasks, environment.                                                                               | Used the SEIPS model to 1) guide the assessment of systems, processes and outcomes and 2) evaluate system redesign interventions.                                                             | tasks            | environment      | technology       |
| Casper              | 2005        | Condensed observations into flowcharts. Examined variations in nurses' strategies to achieving the same goals.                                                    | A work system study to support the development of a technology enhanced practice (TEP) system for home care nurses dealing with CHF patients. This paper reports on the first phase (design). | flowcharts       | strategies       | goals            |
| Clarke              | 2003        | Everyday working practices                                                                                                                                        | Document work on the toxicology ward at one hospital                                                                                                                                          | everyday         | practices        |                  |
| Cortizas            | 1996        | Process flowchart - not task analysis, but "process steps".                                                                                                       | Process improvement project to improve efficiency of specimen processing in a hospital laboratory.                                                                                            | process          | flowchart        | steps            |

| <b>First Author</b> | <b>Year</b> | <b>Definition of workflow</b>                                                                  | <b>Scope of study</b>                                                                                                                                                                 | <b>Keyword 1</b> | <b>Keyword 2</b> | <b>Keyword 3</b>     |
|---------------------|-------------|------------------------------------------------------------------------------------------------|---------------------------------------------------------------------------------------------------------------------------------------------------------------------------------------|------------------|------------------|----------------------|
| Dourish             | 1999        | Collaborative task activities                                                                  | Evaluation of coordination of work across boundaries, set at multiple bank branches                                                                                                   | collaborative    | tasks            | activities           |
| D'Souza             | 2003        | Tasks                                                                                          | CSCW system designed to assist in task completion                                                                                                                                     | tasks            | evaluation       |                      |
| Dykes               | 2005        | Unknown                                                                                        | Workflow analysis at a primary care practice                                                                                                                                          | n/a              |                  |                      |
| Earl                | 1995        | BPR = approaches for initiating and managing "radical" changes in existing business processes. | Four in-depth case studies to understand how firms define and manage the relationship between business strategic planning, process reengineering projects, and IS strategic planning. | BPR              | change           | manage               |
| Endress             | 2006        | Collections of tasks with a defined start event and finish event                               | Analyzed workflow through a network technique to generate a critical path method network diagram of OR workflow                                                                       | start event      | finish event     | collections of tasks |
| Faergemann          | 2005        | Work activities and collaboration/coordination to accomplish tasks                             | Pregnancy care in one hospital, including multiple wards and providers included in care                                                                                               | tasks            | collaboration    | coordination         |

| <b>First Author</b> | <b>Year</b> | <b>Definition of workflow</b>                                                                 | <b>Scope of study</b>                                                                                                                                                   | <b>Keyword 1</b> | <b>Keyword 2</b>  | <b>Keyword 3</b> |
|---------------------|-------------|-----------------------------------------------------------------------------------------------|-------------------------------------------------------------------------------------------------------------------------------------------------------------------------|------------------|-------------------|------------------|
| Flanagan            | 2007        | Focus on information required at various steps in design process.                             | Explores the use of "design confidence" as a part of process models to compensate for the loss of tacit overview knowledge in increasingly dynamic design environments. | information      | process           | design           |
| Fontanesi           | 2000        | Unclear, never explicitly stated                                                              | Development of low cost user-friendly tool to understand workflow                                                                                                       | n/a              |                   |                  |
| Fontanesi           | 2002        | Work tasks                                                                                    | Workflow analysis at community clinics participating focused on immunizations                                                                                           | tasks            |                   |                  |
| Furniss             | 2006        | Work tasks                                                                                    | Emergency medical dispatch                                                                                                                                              | tasks            | focused           |                  |
| Goorman             | 2000        | Work activities                                                                               | Field study of EMR use at an inpatient ward, as it relates to the work of nurses                                                                                        | activities       | interruptions     | processes        |
| Govindaraj          | 1997        | Functions performed by individuals                                                            | Engineering design activities during development of a hardware component                                                                                                | functions        | individuals       |                  |
| Graves              | 2006        | Tasks                                                                                         | Evaluation of workflow in one unit (the serials unit) of an academic library                                                                                            | tasks            | information needs |                  |
| Grote               | 2000        | Three levels of analysis: human-machine system, work tasks of human operator and work system. | Presents the KOMPASS method for analyzing work systems                                                                                                                  | technology       | individuals       | work system      |

| <b>First Author</b> | <b>Year</b> | <b>Definition of workflow</b>                                                                        | <b>Scope of study</b>                                                                                                                                                     | <b>Keyword 1</b>    | <b>Keyword 2</b> | <b>Keyword 3</b> |
|---------------------|-------------|------------------------------------------------------------------------------------------------------|---------------------------------------------------------------------------------------------------------------------------------------------------------------------------|---------------------|------------------|------------------|
| Guerrero            | 1996        | Activities reported by nurses prompted by a routine, repeated page.                                  | The impact of an automated dispensing system (ADS) on medication-related work activities by nurses and pharmacists was studied.                                           | activities          | prompted         | routine          |
| Gurses              | 2007        | Job performance, especially in terms of how the work environment impacts it.                         | Evaluation of performance obstacles encountered by ICU nurses (in 7 hospitals) in their work context                                                                      | performance         | environment      |                  |
| Hallock             | 2006        | Processes involved in the work system (no formal definition given)                                   | Large outpatient group of clinics (30 clinics)                                                                                                                            | processes           | work system      |                  |
| Hartwood            | 2003        | Everyday work activities and the work required to accomplish tasks.                                  | Focused on inter-service work in the context of UK psychiatric healthcare, with an emphasis on referrals from one healthcare service to another and the impact of the EMR | everyday            | activities       | tasks            |
| Hazlehurst          | 2004        | Focus on planning activities and configuration of artifacts in space.                                | Ethnographic research to understand how resources are configured to accomplish successful surgery and prevent adverse events.                                             | planning activities | artifacts        | space            |
| Heaton              | 2000        | Task analysis/ projecting of existing and proposed system. Time study for net comparable activities. | Simulation pilot study to examine the differences between existing and proposed systems for repacking drugs into unit of use packaging in a community pharmacy.           | task analysis       | projecting       | time study       |



| <b>First Author</b> | <b>Year</b> | <b>Definition of workflow</b>                                                                               | <b>Scope of study</b>                                                                                                    | <b>Keyword 1</b> | <b>Keyword 2</b> | <b>Keyword 3</b>   |
|---------------------|-------------|-------------------------------------------------------------------------------------------------------------|--------------------------------------------------------------------------------------------------------------------------|------------------|------------------|--------------------|
| Hengst              | 2004        | Business processes                                                                                          | This paper reports on lessons learned between 1992 and 2003 regarding the combination of BPR, groupware, and simulation. | business         | processes        | simulation         |
| Hill                | 1995        | Interactive systems comprising combinations of people and office devices that support effective interaction | Performance of planning and control of multiple task work in medical reception at a small outpatient clinic              | people           | technology       | interaction        |
| Horsky              | 2005        | Tasks                                                                                                       | Small-scale study of physician interaction with a CPOE system                                                            | tasks            | simulation       |                    |
| Hsiao               | 2006        | Work practices, tasks                                                                                       | Goal of understanding knowledge embodied in existing work practices                                                      | practices        | tasks            | embodied knowledge |
| Hughes              | 1999        | Not defined                                                                                                 | Investigation of work in multiple bank branches over a period of years                                                   | n/a              |                  |                    |
| Jaspers             | 2002        | Tasks                                                                                                       | Information needs and search strategy of physicians in a cancer-care unit                                                | tasks            | interaction      | technology         |
| Jerva               | 2001        | "Business practices"                                                                                        | Viewpoint article: discusses the merits of BPR as a part of information systems development.                             | BPR              | process          | practices          |
| Johnson             | 2006        | Activities involved in accomplishing a specific tasks/process                                               | Interview of 19 providers focused on the prescribing process                                                             | activities       | specific task    | process            |

| <b>First Author</b> | <b>Year</b> | <b>Definition of workflow</b>                                                                                                                                                                                                                                                                                                                                                                                           | <b>Scope of study</b>                                                                                                                                        | <b>Keyword 1</b> | <b>Keyword 2</b> | <b>Keyword 3</b> |
|---------------------|-------------|-------------------------------------------------------------------------------------------------------------------------------------------------------------------------------------------------------------------------------------------------------------------------------------------------------------------------------------------------------------------------------------------------------------------------|--------------------------------------------------------------------------------------------------------------------------------------------------------------|------------------|------------------|------------------|
| Kalinski            | 2008        | Process steps that are available to measure through the extant information system.                                                                                                                                                                                                                                                                                                                                      | Used data from existing system to examine workflow in pathology department, focusing on processing times.                                                    | process steps    | measure          | technology       |
| Karasti             | 2001        | Includes meaning and is constructed by participants and designers.                                                                                                                                                                                                                                                                                                                                                      | By scrutinising the unfolding discourse of workshop participants the co-construction of work practice issues as relevant design considerations is described. | meaning          | constructed      | participants     |
| Kelly               | 1997        | Clinical processes are those that address the actual medical needs of patients and include diagnosis, treatment, and prevention. Operational processes support clinical processes and involve patient flow issues. Administrative processes provide infrastructure support to clinical and operational (patient flow) processes, as well as support the culture and behaviors desired in the care delivery environment. | Reports preliminary results of a large-scale reengineering project in a surgical service.                                                                    | processes        | culture          | environment      |

| <b>First Author</b> | <b>Year</b> | <b>Definition of workflow</b>                                                                                                                                                                                                                                      | <b>Scope of study</b>                                                               | <b>Keyword 1</b> | <b>Keyword 2</b> | <b>Keyword 3</b> |
|---------------------|-------------|--------------------------------------------------------------------------------------------------------------------------------------------------------------------------------------------------------------------------------------------------------------------|-------------------------------------------------------------------------------------|------------------|------------------|------------------|
| Kleiner             | 2006        | Work system: comprises two or more people working together (i.e. personnel sub-system), interacting with technology (i.e. technological sub-system) within an organizational system that is characterized by an internal environment (both physical and cultural). | Overview article of the field of macroergonomics and related methods.               | environment      | working together | technology       |
| Kobayashi           | 2005        | Normal/routine practices                                                                                                                                                                                                                                           | Ethnographic study of workarounds in one trauma unit at one hospital                | routine          | normal           | practices        |
| Kumar               | 2004        | Process steps - depicted in relationship with customers and functional areas.                                                                                                                                                                                      | Description of process redesign project.                                            | process steps    | relationship     | functional       |
| Landgren            | 2007        | Communication interactions, specifically related to the use of mobile phones.                                                                                                                                                                                      | Investigates mobile phone interaction in the organizing of emergency response work. | communication    | interaction      | organizing       |
| Laxmisan            | 2007        | Process of care and movement                                                                                                                                                                                                                                       | Impact of multitasking on cognition in an adult ED at one hospital                  | process          | movement         |                  |
| Lederman            | 2002        | Stages/steps in radiology process                                                                                                                                                                                                                                  | Focused on workflow in radiology at a hospital with a semi-automated system         | stages           | steps            | process          |

| <b>First Author</b> | <b>Year</b> | <b>Definition of workflow</b>                                                                                                                                    | <b>Scope of study</b>                                                                                                                             | <b>Keyword 1</b> | <b>Keyword 2</b> | <b>Keyword 3</b> |
|---------------------|-------------|------------------------------------------------------------------------------------------------------------------------------------------------------------------|---------------------------------------------------------------------------------------------------------------------------------------------------|------------------|------------------|------------------|
| LeRouge             | 2007        | Focus on telemedicine encounters - work practices and the organization of work. Includes technology, decision-making, medical procedures and human interactions. | Specify the "use quality" construct in the context of a mission-critical system deployment.                                                       | practices        | organization     | interaction      |
| Lin                 | 1996        | Detailed tasks and information relevant to the use of space.                                                                                                     | The development and evaluation of a new work system and facility design for a chain of community pharmacies are described.                        | tasks            | information      | space            |
| MacKay              | 1999        | Work practices, use of artifacts in a social context.                                                                                                            | Field studies that examine the use of flight strips by air traffic controllers.                                                                   | practices        | artifacts        | social context   |
| Malhotra            | 2005        | Tasks performed by individuals in an environment                                                                                                                 | Study of work in on ICU at one hospital                                                                                                           | tasks            | environment      | individuals      |
| Malhotra            | 2007        | Tasks performed by individuals in an environment                                                                                                                 | Study of one ICU at one hospital                                                                                                                  | tasks            | environment      | individuals      |
| Mark                | 2002        | Focusing on rules (conventions) for interaction - problems that cooperating partners face in handling shared objects in electronic work                          | Describes a case study which illustrates the difficulty for a distributed group in recognizing coordination situations and enforcing conventions. | interaction      | cooperation      | shared objects   |
| Martin              | 2007        | Processes involved in accomplishing tasks                                                                                                                        | Evaluation of the impact of a contract on real world design practice and project work                                                             | processes        | tasks            | accomplishing    |

| <b>First Author</b> | <b>Year</b> | <b>Definition of workflow</b>                                                                                                                          | <b>Scope of study</b>                                                                                                   | <b>Keyword 1</b> | <b>Keyword 2</b>    | <b>Keyword 3</b>     |
|---------------------|-------------|--------------------------------------------------------------------------------------------------------------------------------------------------------|-------------------------------------------------------------------------------------------------------------------------|------------------|---------------------|----------------------|
| Mbambo              | 2003        | Tasks (not sure if or how the granularity of tasks is standardized).                                                                                   | Job analysis of nurses to describe current practice, clarify expectations, and make recommendations about skill mix.    | tasks            | practices           | role                 |
| McCarthy            | 2004        | Focus on communication, mutual construction of meaning.                                                                                                | Examines how meaning is constructed through telephonic dialogue in the work of ambulance control staff.                 | communication    | mutual construction | constructing meaning |
| Merrill             | 2007        | Focused on measures of individual communication patterns and organizational network such as density, complexity, situation awareness, efficiency, etc. | Organizational network analysis to describe information and process flow in a public health department.                 | activities       | reading             | writing              |
| Michel-Verkerke     | 2004        | Broader scale of patient care across a system, rather than individuals                                                                                 | Care for MS patients across a Dutch region                                                                              | system           | broader scale       |                      |
| Miller              | 2003        | Discrete sub-processes involved in patient care                                                                                                        | Assessment of inefficiencies/quality issues in ED sub processes                                                         | sub-processes    | discrete            |                      |
| Mira                | 2001        | Flowcharts of laboratory tasks. Outcome of focus was turnaround time.                                                                                  | Intervention included reorganization and introduction of new sample collection system. Examined processes and outcomes. | flowcharts       | tasks               | outcome              |

| <b>First Author</b> | <b>Year</b> | <b>Definition of workflow</b>                                                              | <b>Scope of study</b>                                                                                                                      | <b>Keyword 1</b> | <b>Keyword 2</b> | <b>Keyword 3</b> |
|---------------------|-------------|--------------------------------------------------------------------------------------------|--------------------------------------------------------------------------------------------------------------------------------------------|------------------|------------------|------------------|
| Mira                | 1999        | Process flow.                                                                              | Introduced organizational change in lab - measured outcomes in turnaround time and cost.                                                   | process          | flow             |                  |
| Mirel               | 2003        | Interactions and relationships in individuals' actions, practical patterns of inquiry      | Focused on complex problem solving tasks                                                                                                   | interaction      | relationships    | actions          |
| Moss                | 2007        | Focused on "information tasks" (no definition given)                                       | Development of structured observation data collection tool in a CICU and in a medical unit                                                 | collaborative    | patterns         |                  |
| Mueller             | 1999        | Processes at a high level with focus on location, roles of participants and data required. | Part of the development of decision support software - included survey to assess attitudes toward decision aids and process flow analysis. | process          | macro-level      | environment      |
| Muller              | 2002        | Work activities                                                                            | Study of software designers at one company working on Lotus software products                                                              | activities       | products         | environment      |
| Muller              | 1999        | Work activities and tasks, focused on knowledge work components                            | Explores relationships between choice of analytic technique and visibility of operators' work.                                             | activities       | knowledge work   | visibility       |
| Nemeth              | 2006        | A focus on the cognitive aspects of work and the use of artifacts.                         | Examination of the uses of the paper sign-out sheet by residents in a surgical ICU.                                                        | cognitive        | artifacts        |                  |

| <b>First Author</b> | <b>Year</b> | <b>Definition of workflow</b>                                                                                              | <b>Scope of study</b>                                                                                                                                                                                                                                                   | <b>Keyword 1</b> | <b>Keyword 2</b>   | <b>Keyword 3</b> |
|---------------------|-------------|----------------------------------------------------------------------------------------------------------------------------|-------------------------------------------------------------------------------------------------------------------------------------------------------------------------------------------------------------------------------------------------------------------------|------------------|--------------------|------------------|
| Newman              | 2000        | Major phases of work and the tools and representations used by participants. Also the products of the work were described. | Study of web designers and their practices.                                                                                                                                                                                                                             | phases of work   | tools              | representations  |
| Nuutinen            | 2005        | Tasks, activities and practices                                                                                            | Work in three different industries                                                                                                                                                                                                                                      | tasks            | activities         | practices        |
| Olsson              | 2005        | Broad perspective - "work environment".                                                                                    | Multi-disciplinary investigation of train drivers' work environment, including usability evaluation of the Automatic Train Control (ATC) system, cognitive work and ergonomic analyses, and analyses of stress, mental workload, and number and nature of hours worked. | environment      | cognitive          | workload         |
| Osterlund           | 2007        | Work practices                                                                                                             | An ethnographic exploration of the genre combinations enacted by doctors and nurses of an urban ER.                                                                                                                                                                     | practices        | genre combinations | role             |
| Pai                 | 2003        | High level process with focus on use of space.                                                                             | Intervention included change in workflow and space to allow a pharmacist diabetes intervention.                                                                                                                                                                         | process          | space              |                  |
| Papantoniou         | 2005        | Focus on cognitive work and shared cognition.                                                                              | Describe the results of analysis of anesthesia work from two perspectives: Internalist and Externalist.                                                                                                                                                                 | cognitive        | shared cognition   |                  |

| <b>First Author</b> | <b>Year</b> | <b>Definition of workflow</b>                                | <b>Scope of study</b>                                                                                                                                                                | <b>Keyword 1</b>    | <b>Keyword 2</b>  | <b>Keyword 3</b>       |
|---------------------|-------------|--------------------------------------------------------------|--------------------------------------------------------------------------------------------------------------------------------------------------------------------------------------|---------------------|-------------------|------------------------|
| Pinelle             | 2005        | Focus on collaboration.                                      | Field trials of Mohoc, a groupware system designed for loosely coupled groups.                                                                                                       | collaboration       | loosely-coupled   |                        |
| Pinelle             | 2003        | Focused on collaboration patterns.                           | Describe patterns of work in mobile groups that adopt a loosely coupled collaboration style.                                                                                         | communication       | patterns          | organizational network |
| Pinelle             | 2002        | Hierarchical view of tasks based on role.                    | Introduces groupware walkthrough, a new usability inspection technique for groupware.                                                                                                | hierarchical        | tasks             | role                   |
| Plowman             | 1995        | Complex actions and interactions that occur in work settings | Overview article of research on work - also a potentially useful figure.                                                                                                             | actions             | interactions      | setting                |
| Poltrack            | 2003        | Focus on information needs/ information retrieval.           | We describe field studies of information gathering in two design teams that had very different products, disciplinary backgrounds, and tools.                                        | information         | information needs | information retrieval  |
| Pott                | 2005        | Situation awareness as an attribute of work                  | To support development of a DSS - conducted a survey of situation awareness issues among anaesthetists across 29 countries, focusing on information they use and problems they face. | situation awareness |                   |                        |



| <b>First Author</b> | <b>Year</b> | <b>Definition of workflow</b>                                                                                   | <b>Scope of study</b>                                                                                                                                                                                                                                                 | <b>Keyword 1</b> | <b>Keyword 2</b> | <b>Keyword 3</b> |
|---------------------|-------------|-----------------------------------------------------------------------------------------------------------------|-----------------------------------------------------------------------------------------------------------------------------------------------------------------------------------------------------------------------------------------------------------------------|------------------|------------------|------------------|
| Randall             | 1995        | Work practices                                                                                                  | Contrast between business process re-engineering (BPR) and ethnography                                                                                                                                                                                                | practices        | BPR              | ethnography      |
| Reddy               | 2002        | Balancing constraints; information cannot be separated from the work it supports and generates; rhythms of work | A SICU in one hospital                                                                                                                                                                                                                                                | balancing        | information      | rhythms          |
| Reddy               | 2008        | Work activities and how they are organized                                                                      | Field study of collaborative information seeking behavior in an ED of one small hospital                                                                                                                                                                              | activities       | organized        | collaborative    |
| Reijers             | 2005        | Describes multiple approaches to work analysis.                                                                 | To evaluate the impact of each best practice along the dimensions of cost, flexibility, time and quality, a conceptual framework is presented that synthesizes views from areas such as information systems development, enterprise modeling and workflow management. | work             | approaches       | best practice    |
| Reiner              | 2002        | Role-based process flowcharts, task/ sub-task analysis.                                                         | Survey to assess the impact of various technologies on the work of radiology personnel.                                                                                                                                                                               | role-based       | process          | flowchart        |
| Reyes               | 2004        | Communication activities as "work practice". Focus on temporal patterns.                                        | Interaction analysis of participants in a newsgroup.                                                                                                                                                                                                                  | communication    | activities       | temporal         |

| <b>First Author</b> | <b>Year</b> | <b>Definition of workflow</b>                                                                                                                             | <b>Scope of study</b>                                                                                                                               | <b>Keyword 1</b> | <b>Keyword 2</b> | <b>Keyword 3</b> |
|---------------------|-------------|-----------------------------------------------------------------------------------------------------------------------------------------------------------|-----------------------------------------------------------------------------------------------------------------------------------------------------|------------------|------------------|------------------|
| Sadler              | 2006        | Management of work practices, personal attributes of work practice                                                                                        | Study of participants working on a creative project. Specifically focused on use of mobile phones and strategies for managing overlapping contexts. | practices        | personal         | management       |
| Salvador            | 1997        | Work responsibilities, job tasks, and interactions among individuals                                                                                      | Goal: to gain an understanding of the ways in which intensive computing power supports an individual's work.                                        | responsibilities | tasks            | interactions     |
| Sawyer              | 2006        | Articulation: work that enables other work; no formal workflow definition                                                                                 | Field trial of mobile access to an IT system with 18 participants in 2 phases with emphasis on articulation work                                    | articulation     | enable work      |                  |
| Schwartz            | 1999        | Focus on scope of work (internal/external), information flow, document register, content analysis, technology use.                                        | "How-to" article for BPR in publishing.                                                                                                             | information flow | scope of work    | technology       |
| Sharit              | 1998        | Includes work context (task analysis, performance shaping factors, sociotechnical systems analysis, frame), human behavioral tendencies, adverse outcomes | Discusses the role of human reliability analysis (HRA) in the design of written work procedures.                                                    | context          | behavioral       | outcomes         |
| Sierhuis            | 2002        | Work system including: Agent, Object, Geography, Activity, Timing, Knowledge, Communication.                                                              | Describe the Brahms tool for simulating and modeling work practice.                                                                                 | knowledge        | temporal         | simulation       |

| <b>First Author</b> | <b>Year</b> | <b>Definition of workflow</b>                                                                                                                                                                                                                                                                                                              | <b>Scope of study</b>                                                                                                                                                                                                                                                                                                                                                                        | <b>Keyword 1</b> | <b>Keyword 2</b> | <b>Keyword 3</b> |
|---------------------|-------------|--------------------------------------------------------------------------------------------------------------------------------------------------------------------------------------------------------------------------------------------------------------------------------------------------------------------------------------------|----------------------------------------------------------------------------------------------------------------------------------------------------------------------------------------------------------------------------------------------------------------------------------------------------------------------------------------------------------------------------------------------|------------------|------------------|------------------|
| Sonnenwald          | 2000        | Work processes: information about work practice: tasks, formal task procedures (how tasks can be done) and informal task procedures (how tasks are really done), changes in the situation that require a shift in attention and tasks, informatino from other team members, effective communication methods, information about leadership. | Explores information behavior in C2 at the army battalion level.                                                                                                                                                                                                                                                                                                                             | processes        | formal tasks     | informal tasks   |
| Spinuzzi            | 2001        | Compound mediation refers to the ways that workers coordinate sets of artifacts to help them get their jobs done. For instance, a software developer might simultaneously use software manuals, existing code, online language references, and scratch paper as she writes new code.                                                       | By applying the three frameworks to the same study, I illustrate which aspects of compound mediation are illuminated and unexplored by each analytical framework. Based on the comparison, I discuss the strengths and weaknesses of each framework for exploring compound mediation, and I suggest ways in which the frameworks might be coordinated to produce different pictures of work. | coordinate       | artifacts        | mediation        |

| <b>First Author</b> | <b>Year</b> | <b>Definition of workflow</b>                                                                                                                           | <b>Scope of study</b>                                                                                                                  | <b>Keyword 1</b>      | <b>Keyword 2</b>     | <b>Keyword 3</b> |
|---------------------|-------------|---------------------------------------------------------------------------------------------------------------------------------------------------------|----------------------------------------------------------------------------------------------------------------------------------------|-----------------------|----------------------|------------------|
| Spinuzzi            | 2002        | Focus on communication and documentation.                                                                                                               | Describes the development of a formal model of the genres used by two teams.                                                           | communication         | documentation        | genres           |
| Stubblefield        | 2000        | Movement of documents through the authorization process (highly focused and specific)                                                                   | Fieldwork to show the social role that engineering authorizations played in work in the laboratory                                     | movement              | focused              | specific         |
| Suchman             | 1995        | Work activities including both visible work and invisible work                                                                                          | Viewpoint article arguing for more reflexive research practices and more conceptually rich research interpretations of work.           | activities            | visible              | invisible        |
| Symon               | 1996        | Procedural trajectory: the conduct of the radiological examination and the work organization around this process as they undergo a particular procedure | Study of cooperation and coordination within and between radiology and other departments at one hospital                               | procedural trajectory | organization         | process          |
| Timpka              | 1996        | Workflow is a combination of practices; "practices that together constitute clinical microbiological work in a hospital setting"                        | Preliminary study focused on processes for one lab test; full study looked at several lab processes from wards/units to the laboratory | combination           | practices            | together         |
| Tucker              | 2006        | Tasks in providing nursing care                                                                                                                         | Nursing work, with emphasis on operational failures and their impact on nursing work                                                   | tasks                 | operational failures | role             |

| <b>First Author</b> | <b>Year</b> | <b>Definition of workflow</b>                                  | <b>Scope of study</b>                                                                                                                                                | <b>Keyword 1</b> | <b>Keyword 2</b> | <b>Keyword 3</b>    |
|---------------------|-------------|----------------------------------------------------------------|----------------------------------------------------------------------------------------------------------------------------------------------------------------------|------------------|------------------|---------------------|
| Unertl              | 2006        | Work activities coordinated among individuals and team         | Workflow and information flow in one outpatient clinic                                                                                                               | activities       | coordination     | information flow    |
| Urden               | 1997        | Sequences of tasks, categories of tasks                        | Application of work sampling to one clinical environment, focused on work practices of nurses.                                                                       | sequence         | tasks            | categories of tasks |
| Uys                 | 2002        | Process of work, activities involved in caregiving work.       | Evaluation of the work of community care givers for people with HIV in Africa, small scale descriptive study.                                                        | process          | work             | activities          |
| Vargas Cortes       | 1996        | Not defined. I'm not sure this paper is really about workflow. | Comparison of work on an engineering level (middle management, white collar) during a non-steady state process and a steady-state process using the B/W/K work model | n/a              |                  |                     |
| Wakkary             | 2007        | The role of design in everyday routines and systems            | Family members as everyday designers, 5-month study of three families. Focus on "everyday design"                                                                    | routines         | systems          | everyday            |
| Waterson            | 2002        | Tasks during system operation                                  | Development of a method to assist in allocation of work between humans and machines - function allocation - and also between humans.                                 | tasks            | technology       | allocation          |

| <b>First Author</b> | <b>Year</b> | <b>Definition of workflow</b>                                                                                                                                                                           | <b>Scope of study</b>                                                                                                             | <b>Keyword 1</b> | <b>Keyword 2</b> | <b>Keyword 3</b> |
|---------------------|-------------|---------------------------------------------------------------------------------------------------------------------------------------------------------------------------------------------------------|-----------------------------------------------------------------------------------------------------------------------------------|------------------|------------------|------------------|
| Wisner              | 1995        | Tasks and activities to accomplish real-world work                                                                                                                                                      | Historical overview of ergonomic work analysis, focused on problem building and problem solving                                   | tasks            | activities       | real-world       |
| Wong                | 2003        | Steps in a process                                                                                                                                                                                      | Observation of medication ordering in one medical unit (and pharmacy?), plus simulation of proposed process changes               | steps            | process          |                  |
| Wright              | 2000        | Work practice evolves around technology and technology is changed by work practice. Such co-evolution of work and technology can change the meaning of functions allocated to both humans and machines. | Two case studies centered around articulation work and automation, specifically related to aircraft and takeoff/landing maneuvers | practices        | articulation     | allocation       |
